# Supplementary material for: Causes of interannual variability over the southern hemispheric tropospheric ozone maximum
Source: Copernicus journal article supplement (doi:10.5194/acp-17-3279-2017), 2017-03-07
Supplement: Supplementary file 1 [file acp-17-3279-2017-supplement.pdf]

Supplement of Atmos. Chem. Phys., 17, 3279–3299, 2017  
<http://www.atmos-chem-phys.net/17/3279/2017/>  
doi:10.5194/acp-17-3279-2017-supplement  
© Author(s) 2017. CC Attribution 3.0 License.

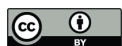

Atmospheric  
Chemistry  
and Physics  
Open Access  
EGU

*Supplement of*

## **Causes of interannual variability over the southern hemispheric tropospheric ozone maximum**

**Junhua Liu et al.**

*Correspondence to:* Junhua Liu ([junhua.liu@nasa.gov](mailto:junhua.liu@nasa.gov))

The copyright of individual parts of the supplement might differ from the CC-BY 3.0 licence.

## Method of calculating the variance explained by each predictor in the regression

Table 1: Definition of symbols

| Quantity | Definition                       | Description                                                |
|----------|----------------------------------|------------------------------------------------------------|
| SYY      | $\sum (y_i - \bar{y})^2$         | Sum of squares for the y's                                 |
| RSS      | $\sum (y_i - x_i \hat{\beta})^2$ | Residual sum of squares                                    |
| SSreg    | SYY-RSS                          | Sum of squares for the regression                          |
| $r^2$    | SSreg/SYY                        | The proportion of variability in Y explained by regression |

Table 2: Two Analysis Of Variance table with different orders of fitting (Example for regression with StratO<sub>3</sub> and EmisO<sub>3</sub> over South Atlantic in December at 270 hPa)

| <i>(a) First analysis</i> |        | <i>(b) Second analysis</i> |        |
|---------------------------|--------|----------------------------|--------|
|                           | Sum Sq |                            | Sum Sq |
| StratO3                   | 110.81 | EmissO3                    | 76.65  |
| EmissO3                   | 25.13  | StratO3                    | 59.29  |
| SSreg                     | 135.94 | SSreg                      | 135.94 |
| RSS                       | 45.47  | RSS                        | 45.47  |
| SYY                       | 181.41 | SYY                        | 181.41 |

Table 3: Variance explained by each predictor following the method described in (Kruskal, 1987;Chevan and Sutherland, 1991; Groemping, 2007)

| Source                               | StratO3 | EmisO3 |
|--------------------------------------|---------|--------|
| Mean Sum Sq                          | 85.05   | 50.89  |
| Variance explained by each predictor | 0.47    | 0.28   |

### Reference:

Chevan, A., and Sutherland, M.: HIERARCHICAL PARTITIONING, American Statistician, 45, 90-96, 10.2307/2684366, 1991.

Groemping, U.: Two simple estimators of relative importance in linear regression based on variance decomposition - Response, American Statistician, 61, 282-283, 2007.

Kruskal, W.: RELATIVE IMPORTANCE BY AVERAGING OVER ORDERINGS, American Statistician, 41, 6-10, 10.2307/2684310, 1987.
